# Supplementary material for: A Wide-Proteome Analysis to Identify Molecular Pathways Involved in Kidney Response to High-Fat Diet in Mice
Source: MDPI journal article supplement (doi:10.3390/ijms23073809), 2022-03-30
Supplement: s1 [file s1]

## Hystological anlayses

**Table S1. General morphology.**

|         | CORTEX                          |                      |           | MEDULLA |            | INTERSTITIUM | VESSELS | PELVIS                                      | MC | RC | PAS |
|---------|---------------------------------|----------------------|-----------|---------|------------|--------------|---------|---------------------------------------------|----|----|-----|
| Case    | Prox convoluted tubules         | Distal conv. tubules | Glomeruli | Henle   | Collectors |              |         |                                             |    |    |     |
| FAT 14  | Tubular vacuolation (Lipidosis) | 0                    | 0         | 0       | 0          | 0            | 0       | Mild lymphoplasmacytic inflammation         | 0  | 0  | 0   |
| FAT 13  | Tubular vacuolation (Lipidosis) | 0                    | 0         | 0       | 0          | 0            | 0       | Minimal Mild lymphoplasmacytic inflammation | 0  | 0  | 0   |
| FAT 12  | Tubular vacuolation (Lipidosis) | 0                    | 0         | 0       | 0          | 0            | 0       | Minimal lymphoplasmacytic inflammation      | 0  | 0  | 0   |
| FAT 11  | Tubular vacuolation (Lipidosis) | 0                    | 0         | 0       | 0          | 0            | 0       | Moderate lymphoplasmacytic inflammation     | 0  | 0  | 0   |
| FAT 10  | Tubular vacuolation (Lipidosis) | 0                    | 0         | 0       | 0          | 0            | 0       | Minimal lymphoplasmacytic inflammation      | 0  | 0  | 0   |
|         |                                 |                      |           |         |            |              |         |                                             |    |    |     |
| LEAN 14 | 0                               | 0                    | 0         | 0       | 0          | 0            | 0       | Minimal lymphoplasmacytic inflammation      | 0  | 0  | 0   |
| LEAN 13 | 0                               | 0                    | 0         | 0       | 0          | 0            | 0       | Minimal lymphoplasmacytic inflammation      | 1  | 0  | 0   |
| LEAN 12 | 0                               | 0                    | 0         | 0       | 0          | 0            | 0       | Minimal lymphoplasmacytic inflammation      | 1  | 0  | 0   |
| LEAN 11 | 0                               | 0                    | 0         | 0       | 0          | 0            | 0       | Minimal lymphoplasmacytic inflammation      | 0  | 0  | 0   |
| LEAN 10 | 0                               | 0                    | 0         | 0       | 0          | 0            | 0       | Minimal lymphoplasmacytic inflammation      | 0  | 0  | 0   |

**Table S2. Lesional score (From Glastras et al 2016 modified for the area of assessment).**

| CASE       | Fibrosis<br>Massons Thricrome/PAS<br>Lesional score as in M&M |                        | Tubular lesions (PAS)<br>Lesional score as in M&M |          |                        |       |
|------------|---------------------------------------------------------------|------------------------|---------------------------------------------------|----------|------------------------|-------|
|            | Tubulointerstitial<br>fibrosis                                | Glomeruloscl<br>erosis | Vacuolation                                       | Dilation | Glycogenated<br>nuclei | Casts |
| FAT<br>14  | 0                                                             | 0                      | 1                                                 | 0        | 0                      | 0     |
| FAT<br>13  | 0                                                             | 0                      | 2                                                 | 0        | 0                      | 0     |
| FAT<br>12  | 0                                                             | 0                      | 3                                                 | 0        | 0                      | 0     |
| FAT<br>11  | 1                                                             | 0                      | 2                                                 | 0        | 1                      | 0     |
| FAT<br>10  | 0                                                             | 0                      | 3                                                 | 0        | 0                      | 0     |
|            |                                                               |                        |                                                   |          |                        |       |
| LEAN<br>14 | 0                                                             | 0                      | 0                                                 | 0        | 0                      | 0     |
| LEAN<br>13 | 1                                                             | 0                      | 0                                                 | 0        | 0                      | 0     |
| LEAN<br>12 | 1                                                             | 0                      | 0                                                 | 0        | 0                      | 0     |
| LEAN<br>11 | 0                                                             | 0                      | 0                                                 | 0        | 0                      | 0     |
| LEAN<br>10 | 0                                                             | 0                      | 0                                                 | 0        | 0                      | 0     |

**Table S3. Glycogenated nuclear counts.**

[illegible]
