# Supplementary material for: A Wide-Proteome Analysis to Identify Molecular Pathways Involved in Kidney Response to High-Fat Diet in Mice
Source: MDPI journal article supplement (doi:10.3390/ijms23073809), 2022-03-30
Supplement: s1 [file s1]

## **Lipid Metabolism-Related genes**

### **1) Fatty Acid Metabolism**

- a) Acetyl-CoA Transferases: ACAA1A, ACAA2, ACAT1, ACAT2
- b) Acyl-CoA Dehydrogenases: ACAD10, ACAD11, ACAD9, ACADL, ACADM, ACADS, ACADSB, ACADVL, EHHADH, GCDH
- c) Acyl-CoA Oxidases: ACOX1, ACOX2, ACOX3
- d) Acyl-CoA Synthetases: ACSBG1, ACSBG2, ACSL1, ACSL3, ACSL4, ACSL5, ACSL6, ACSM2, ACSM3, ACSM4, ACSM5
- e) Acyl-CoA Thioesterases: ACOT12, ACOT2, ACOT3, ACOT6, ACOT7, ACOT8, ACOT9
- f) Carnitine Transferases: CPT1A, CPT1B, CPT1C, CPT2, CRAT, CROT
- g) Other Fatty Acid Metabolism Genes: ALDH2, DECR1, DECR2, ECHS1, ECI2 (ACBD2, PECI), HADHA, MCEE, MUT, PECR, PPA1

### **2) Fatty Acid Transport**

CPT1A, CPT1B, CPT1C, CPT2, CRAT, CROT, FABP1, FABP2, FABP3, FABP4, FABP5, FABP6, SLC27A1, SLC27A2, SLC27A3, SLC27A4, SLC27A5, SLC27A6

### **3) Fatty Acid Biosynthesis Regulation**

PRKAA1 (AMPK), PRKAA2, PRKAB1, PRKAB2, PRKACA, PRKACB, PRKAG1, PRKAG2, PRKAG3

### **4) Ketogenesis & Ketone Body Metabolism**

BDH1, BDH2, HMGCL, HMGCS1, HMGCS2, OXCT2A

### **5) Triacylglycerol Metabolism**

GK, GK2, GPD1, GPD2, LIPE, LPL

## **Fibrosis-Related genes**

### **1) Pro-Fibrotic**

ACTA2 (A-SMA), AGT, CCL11 (EOTAXIN), CCL12 (MCP-5, SCYA12), CCL3 (MIP-1A), CCN2, GREM1, IL13, IL13RA2, IL4, IL5, SNAI1 (SNAIL)

### **2) Anti-Fibrotic**

BMP7, HGF, IFNG, IL10, IL13RA2

### **3) Extracellular Matrix (ECM) & Cell Adhesion Molecules**

a) Extracellular Matrix (ECM) Structural Constituents: COL1A2, COL3A1

b) Extracellular Matrix (ECM) Remodeling Enzymes: LOX, MMP13, MMP14, MMP1A, MMP2, MMP3, MMP8, MMP9, PLAT (TPA), PLA1 (UPA), PLG, SERPINA1A, SERPINE1 (PAI-1), SERPINH1 (HSP47), TIMP1, TIMP2, TIMP3, TIMP4

c) Cell Adhesion Molecules: ITGA1, ITGA2, ITGA3, ITGAV, ITGB1, ITGB3, ITGB5, ITGB6, ITGB8

### **4) Inflammatory Cytokines & Chemokines**

CCL11 (EOTAXIN), CCL12 (MCP-5, SCYA12), CCL3 (MIP-1A), CCR2, CXCR4, IFNG, IL10, IL13, IL13RA2, IL1A, IL1B, IL4, IL5, ILK, TNF

### **5) Growth Factors**

AGT, CCN2, EDN1, EGF, HGF, PDGFA, PDGFB, VEGFA

### **6) Signal Transduction**

a) TGF $\beta$  Superfamily Members: BMP7, CAV1, DCN, ENG (EVI-1), GREM1, INHBE, LTBP1, SMAD2, SMAD3, SMAD4, SMAD6, SMAD7, TGFB1, TGFB2, TGFB3, TGFBR1 (ALK5), TGFBR2, TGIF1, THBS1 (TSP-1), THBS2

b) Transcription Factors: CEBPB, JUN, MYC, NF $\kappa$ B1, SP1, STAT1, STAT6

### **7) Epithelial-to-Mesenchymal Transition (EMT)**

AKT1, BMP7, COL1A2, COL3A1, ITGAV, ITGB1, MMP2, MMP3, MMP9, SERPINE1 (PAI-1), SMAD2, SNAI1 (SNAIL), TGFB1, TGFB2, TGFB3, TIMP1

### **8) Other Fibrosis Genes**

BCL2, FASL
